# Supplementary material
Source: PubMed Central journal article supplement (PMC4852379)
Supplement: NIHMS779676-supplement-SI_Figures_and_Tables.pdf [file NIHMS779676-supplement-SI_Figures_and_Tables.pdf]

## **Stabilizing the C<sub>H</sub>2 domain of an Antibody by Engineering in an Enhanced Aromatic Sequon**

Wentao Chen<sup>†,‡</sup>, Leopold Kong<sup>§</sup>, Stephen Connelly<sup>§</sup>, Julia M. Dendle<sup>†,‡</sup>, Yu Liu<sup>†,‡</sup>, Ian A. Wilson<sup>§,#</sup>, Evan T. Powers<sup>‡,\*</sup>, Jeffery W. Kelly<sup>†,‡,#,\*</sup>

<sup>†</sup>Department of Molecular and Experimental Medicine, The Scripps Research Institute, La Jolla, CA 92037, USA.

<sup>‡</sup>Department of Chemistry, The Scripps Research Institute, La Jolla, CA 92037, USA.

<sup>§</sup>Department of Integrative, Structural and Computational Biology, The Scripps Research Institute, La Jolla, CA 92037, USA.

<sup>#</sup>The Skaggs Institute for Chemical Biology, The Scripps Research Institute, La Jolla, CA 92037, USA.

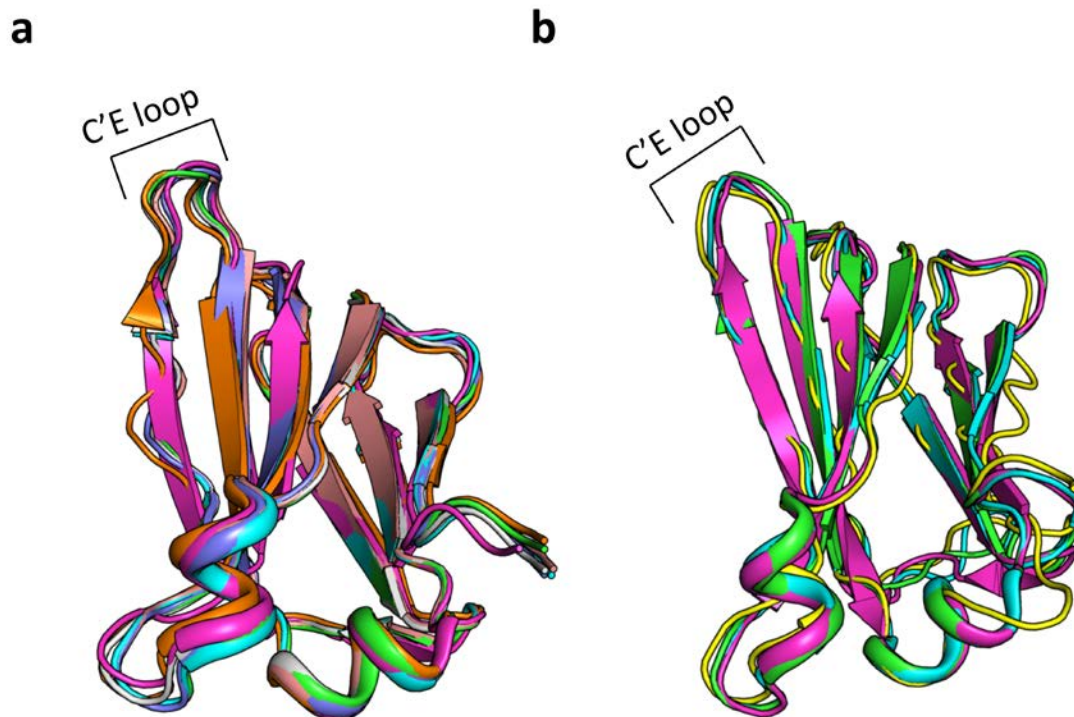

**Figure S1. Alignment of the  $C_H2$  domains of the other Fc structures.** Structures are shown in ribbon format. Only the protein backbone atoms are used in the structural alignment. (a)  $C_H2$  domains in PDBID 2WAH, 4CDH, 1HZH, 3AVE, 3SGJ, 4KU1 and 4X4M are shown in green, cyan, magenta, terra cotta, grey, slate blue and orange, respectively. The C'E loops have type I  $\beta$ -turns. (b) Alignment of the  $C_H2$  domains from structures of the Fc fragment of allotype G1m3 (Cri).  $C_H2$  domains in PDBID 1H3T, 1E4K, 1FC1 and 3RY6 are shown in green, cyan, magenta and yellow, respectively. The C'E loops have type IV  $\beta$ -turns.

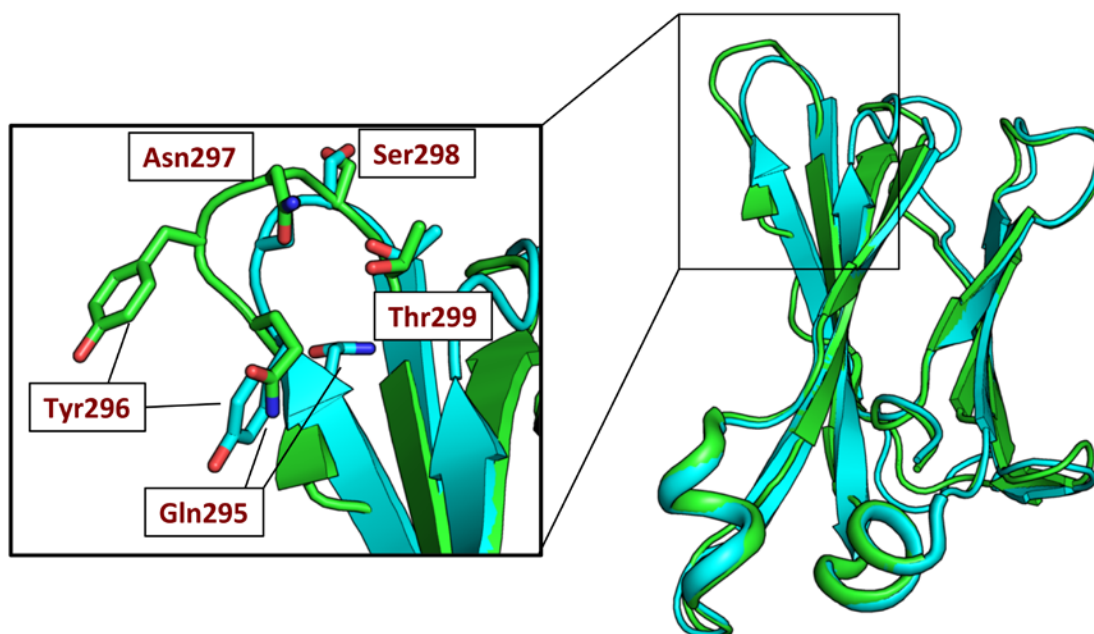

**Figure S2. Alignment of the C<sub>H</sub>2 domains of Fc fragment structures with turn structures.** Only the protein backbone atoms from 3AVE (green, type I β-turn) and 1FC1 (cyan, type IV β-turn) are used in the structural alignment. The side chains of residues Gln295-Thr299 are shown in stick format.

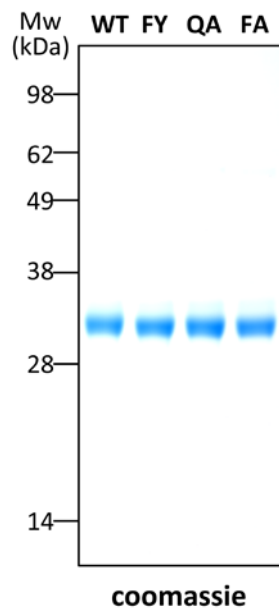

**Figure S3.** Coomassie stained SDS-PAGE of purified Fc fragment variants.

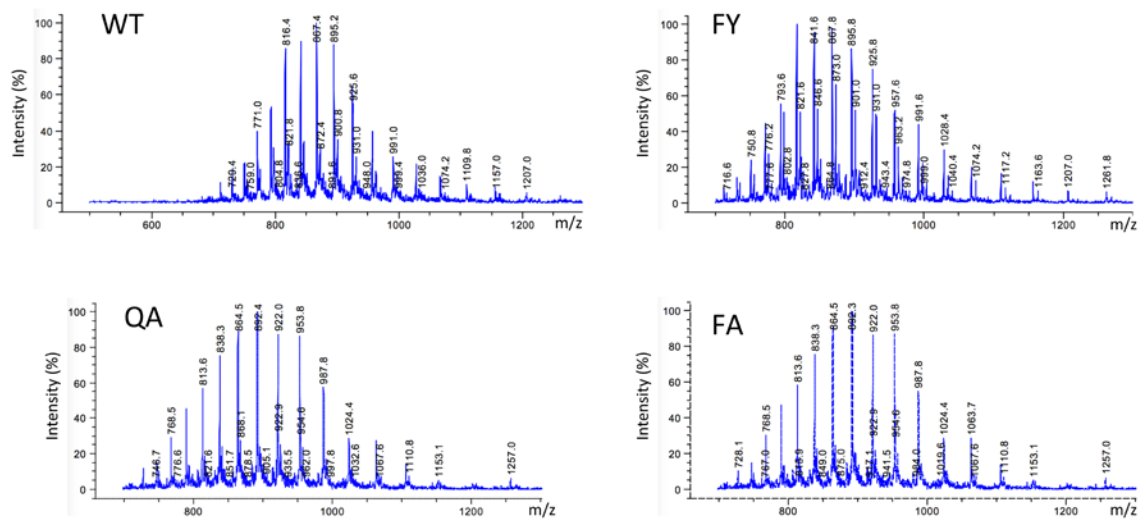

**Figure S4.** ESI-MS data of dithiothreitol-treated Fc fragment variants.

|    | Deconvoluted Mw | Observed Mw | Relative abundance | N-glycan                                                                                     |
|----|-----------------|-------------|--------------------|----------------------------------------------------------------------------------------------|
| WT | 27717           | 27724       | 1.00               |  G0F      |
|    | 27879           | 27883       | 0.41               |  G1F      |
|    | 27838           | 27839       | 0.19               |  hybrid   |
| FY | 27736           | 27739       | 1.00               |  G0F      |
|    | 27898           | 27901       | 0.61               |  G1F      |
|    | 28060           | 28062       | 0.20               |  G2F      |
| QA | 27625           | 27630       | 1.00               |  G0F      |
|    | 27746           | 27749       | 0.29               |  hybrid   |
| FA | 27644           | 27648       | 1.00               |  G0F    |
|    | 27765           | 27766       | 0.25               |  hybrid |

**Figure S5. Deconvoluted molecular weight (Mw) and relative abundance (normalized to the most abundant species) of ESI-MS data for each dithiothreitol-treated Fc fragment variant.** Only those glycoforms that have relative abundance above 0.15 are shown. G# refers to the number of Gal on the two arms and F to fucosylation of the initial GlcNAc residue.

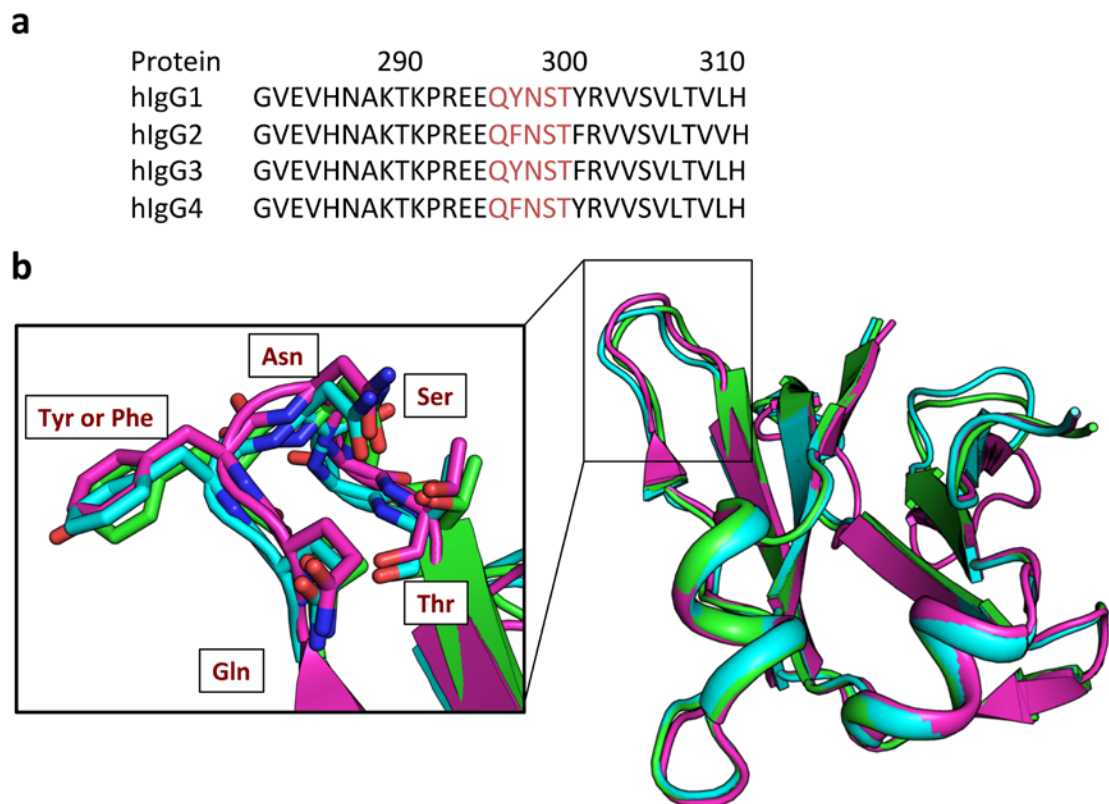

**Figure S6. Sequence alignment and structure of human IgG1-4 around the C'E loop.** (a) Sequence alignment of human IgG1-4 around the C'E loop. Sequences of the C'E loops are highlighted in red. (b) Alignment of the C<sub>H</sub>2 domains from Fc structures of IgG1 (3AVE, green), IgG2 (4HAF, cyan) and IgG4 (4C55, magenta). Only the protein backbone atoms are used in the structural alignment. Inset: The side chains of the residues in the C'E loop (Gln295-Thr299) are shown in stick format.

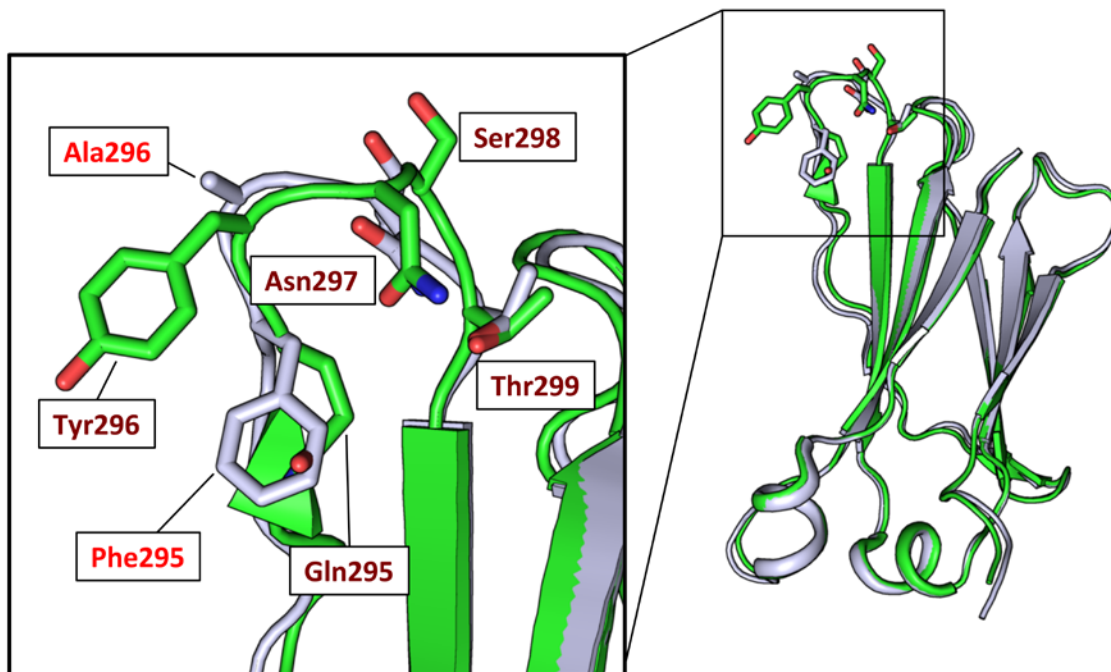

**Figure S7. Alignment of the C<sub>H</sub>2 domains of the Fc structures of wild-type (3AVE, green) and EAS-stabilized Fc (grey). The side chains of Gln295-Thr299 in the wild-type and the Phe295-Thr299 in the EAS-stabilized Fc are indicated and shown in stick format. The N-glycans are not shown.**



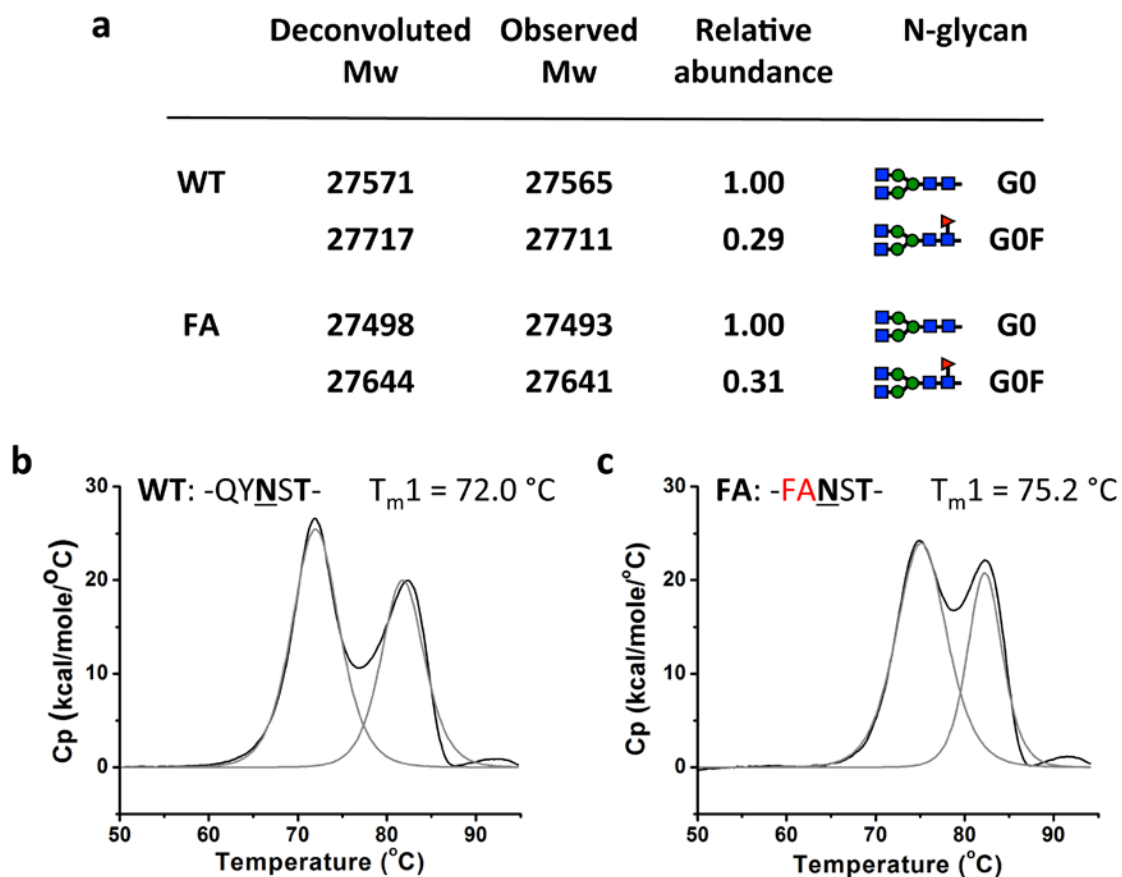

**Figure S8. ESI-MS and DSC analysis of WT and FA Fc variants expressed with inhibition of core fucosylation.** (a) Deconvoluted molecular weight (Mw) and relative abundance (normalized to the most abundant species) of ESI-MS data for each dithiothreitol-treated Fc fragment variant expressed under conditions of core fucosylation inhibition employing 2-deoxy-2-fluoro-L-fucose (200  $\mu\text{M}$ ). (b) The baseline-adjusted DSC trace (black line) showed a two-peak feature for each variant which could be deconvoluted (grey lines) to the melting of  $C_{H2}$  (lower temperature,  $T_{m1}$ ) and  $C_{H3}$  (higher temperature,  $T_{m2}$ ) domains. The protein primary sequence of the C'E loop and  $T_{m1}$  for each variant are shown above the DSC curves.

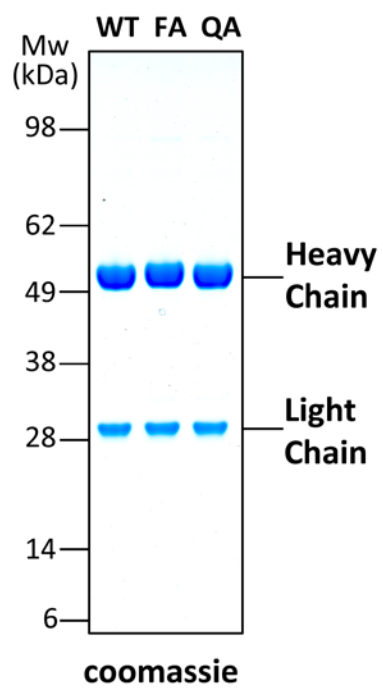

**Figure S9.** Coomassie stained SDS-PAGE of purified 5J8 antibody variants.

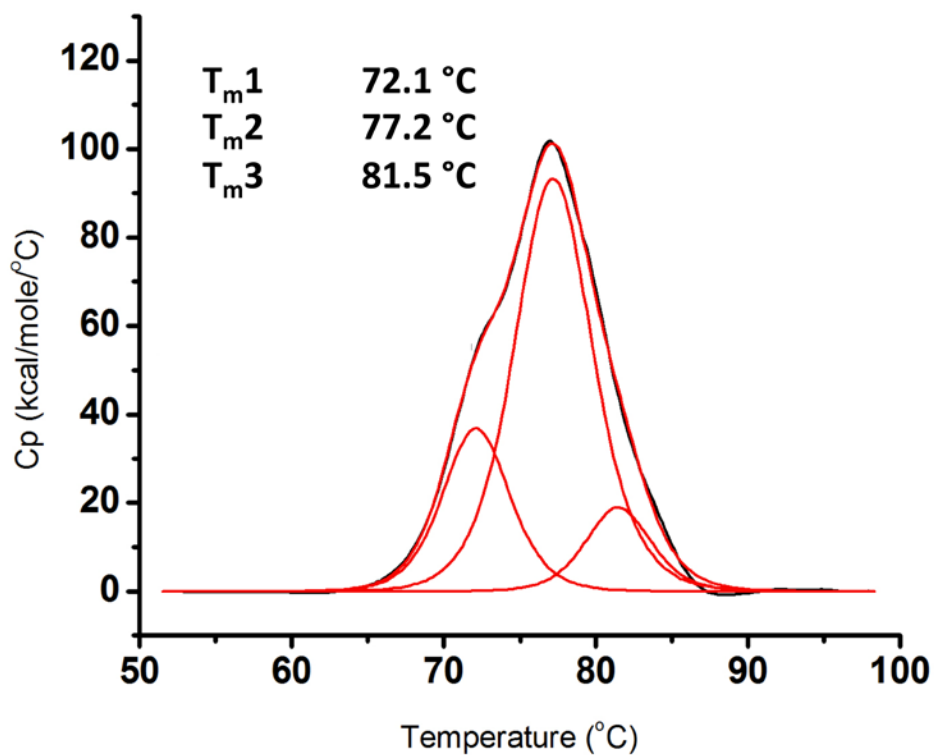

**Figure S10. DSC analysis of the wild-type 5J8 antibody.** The baseline-adjusted DSC trace is shown in black and the deconvoluted peaks, which correspond to the melting of  $C_H2$  ( $T_{m1}$ ), Fab ( $T_{m2}$ ) and  $C_H3$  ( $T_{m3}$ ) domains, are shown in red. The combined signal (also shown in red) of the deconvoluted peaks matches closely to the baseline-adjusted DSC trace.

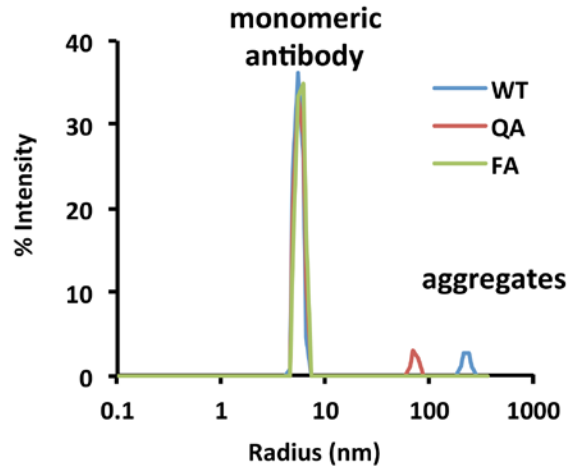

**Figure S11. DLS analysis of the 5J8 variants.** DLS signal of the supernatant of 5J8 antibody samples for WT (blue), QA (red) and FA (green) in pH 3.5 buffer after  $20,000 \times g$  centrifugation. Most of the signal for all three variants is due to the monomeric form ( $R_h = 7$  nm), indicating that high speed centrifugation removes the  $R_h = 100$ -300 nm aggregates from the solution.

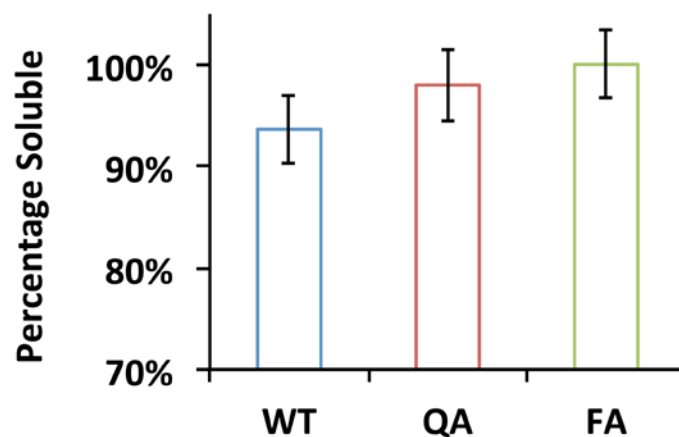

**Figure S12. Quantification of the soluble fraction of 5J8 antibody variants upon diluting in pH 3.5 buffer.** The percentage is calculated by dividing the protein concentration measured by microBCA assay after high speed centrifugation by the protein concentration before high speed centrifugation. Less than 10% of the total protein for each variant is removed by centrifugation, indicating that even such small amounts of the aggregates formed in the WT and QA variants of 5J8 is enough to completely suppress the DLS signal for the monomeric antibodies.

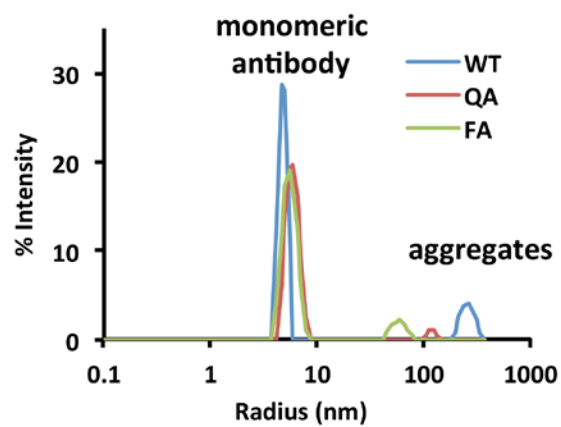

**Figure S13.** DLS signal of 5J8 antibody samples for WT (blue), QA (red) and FA (green) variants after dilution in PBS. Most of the signal for all three variants is due to the monomeric form ( $R_h = 7$  nm).

**Table S1.** Protein primary sequence differences and C'E loop turn types for different PDB structures.

| PDB code | Residue 272 | Residue 283 | Residue 294 | Residue 312 | Residue 315 | Residue 356 | Residue 358 | Residue 393 | turn type | turn residues |
|----------|-------------|-------------|-------------|-------------|-------------|-------------|-------------|-------------|-----------|---------------|
| 1H3T     | Q           | Q           | Q           | N           | D           | E           | M           | T           | IV        | YNST          |
| 1E4K     | Q           | Q           | Q           | N           | D           | E           | M           | T           | IV        | YNST          |
| 1FC1     | Q           | Q           | Q           | N           | D           | E           | M           | T           | IV        | YNST          |
| 3RY6     | Q           | Q           | Q           | N           | D           | E           | M           | T           | IV        | YNST          |
| 2WAH     | E           | E           | E           | D           | N           | D           | L           | A           | I         | QYNS          |
| 4CDH     | E           | E           | E           | D           | N           | D           | L           | T           | I         | QYNS          |
| 1HZH     | E           | E           | E           | D           | N           | D           | L           | T           | I         | QYNS          |
| 3AVE     | E           | E           | E           | D           | N           | D           | L           | T           | I         | QYNS          |
| 3SGJ     | E           | E           | E           | D           | N           | D           | L           | T           | I         | QYNS          |
| 4KU1     | E           | E           | E           | D           | N           | D           | L           | T           | IV        | QYNS          |
| 4X4M     | E           | E           | E           | D           | N           | D           | L           | T           | I         | QYNS          |

**Table S2.** X-ray data collection and refinement statistics.

|                                          |                                                                                           |
|------------------------------------------|-------------------------------------------------------------------------------------------|
| Data collection                          | Human IgG Fc domain with enhanced aromatic sequon                                         |
| X-ray Source                             | SSRL11-1                                                                                  |
| Wavelength (Å)                           | 0.9795                                                                                    |
| Space group                              | C2                                                                                        |
| Unit cell parameters                     | a = 154.1, b = 49.2, c = 75.5 Å<br>$\alpha = \gamma = 90.0^\circ$ , $\beta = 104.2^\circ$ |
| Resolution (Å)                           | 50.0-3.00 (3.05-3.00) <sup>a</sup>                                                        |
| Observations                             | 22,488                                                                                    |
| Unique reflections                       | 10,017(471) <sup>a</sup>                                                                  |
| Redundancy                               | 2.2 (2.1) <sup>a</sup>                                                                    |
| Completeness (%)                         | 88.5 (83.1) <sup>a</sup>                                                                  |
| $\langle I/\sigma \rangle^b$             | 12.9 (1.8) <sup>a</sup>                                                                   |
| $R_{\text{sym}}^c$                       | 0.08 (0.33) <sup>a</sup>                                                                  |
| $R_{\text{pim}}^c$                       | 0.06 (0.26) <sup>a</sup>                                                                  |
| CC <sub>1/2</sub>                        | (0.78) <sup>a</sup>                                                                       |
| Refinement statistics                    |                                                                                           |
| Resolution (Å)                           | 46.85-3.00 (3.29-3.00) <sup>a</sup>                                                       |
| Reflections (work)                       | 9,487 (2,229) <sup>a</sup>                                                                |
| Reflections (test)                       | 518 (135) <sup>a</sup>                                                                    |
| $R_{\text{cryst}}(\%)^c$                 | 29.8 (33.0) <sup>a</sup>                                                                  |
| $R_{\text{free}}(\%)^d$                  | 32.6 (36.5) <sup>a</sup>                                                                  |
| Average B-value (Å <sup>2</sup> )        | 77                                                                                        |
| Fc protein chain A                       | 76                                                                                        |
| Fc glycan chain A                        | 238                                                                                       |
| Fc protein chain B                       | 71                                                                                        |
| Fc glycan chain B                        | 101                                                                                       |
| Wilson B-value (Å <sup>2</sup> )         | 69                                                                                        |
| RMSD from ideal geometry                 |                                                                                           |
| Bond length (Å)                          | 0.004                                                                                     |
| Bond angles (°)                          | 0.846                                                                                     |
| Ramachandran statistics (%) <sup>f</sup> |                                                                                           |
| Favored                                  | 95.0                                                                                      |
| Allowed                                  | 4.0                                                                                       |
| Outliers                                 | 1.0                                                                                       |
| PDB ID                                   | 4QGT                                                                                      |

<sup>a</sup> Numbers in parentheses refer to the highest resolution shell.

<sup>b</sup> Calculated as  $\text{average}(I)/\text{average}(\sigma I)$

<sup>c</sup>  $R_{\text{sym}} = \sum_{hkl} \sum_i |I_{hkl,i} - \langle I_{hkl} \rangle| / \sum_{hkl} \sum_i I_{hkl,i}$ , where  $I_{hkl,i}$  is the scaled intensity of the  $i^{\text{th}}$  measurement of reflection h, k, l,  $\langle I_{hkl} \rangle$  is the average intensity for that reflection, and  $n$  is the redundancy.  $R_{\text{pim}}$  is a redundancy-independent measure of the quality of intensity measurements.  $R_{\text{pim}} = \sum_{hkl} [1/(n-1)]^{1/2} \sum_i |I_{hkl,i} - \langle I_{hkl} \rangle| / \sum_{hkl} \sum_i I_{hkl,i}$ , where  $I_{hkl,i}$  is the scaled intensity of the  $i^{\text{th}}$  measurement of reflection h, k, l,  $\langle I_{hkl} \rangle$  is the average intensity for that reflection, and  $n$  is the redundancy.

<sup>d</sup>  $R_{\text{cryst}} = \sum_{hkl} |F_o - F_c| / \sum_{hkl} |F_o| \times 100$

<sup>e</sup>  $R_{\text{free}}$  was calculated as for  $R_{\text{cryst}}$ , but on a test set comprising 5% of the data excluded from refinement.

<sup>f</sup> These values were calculated using MolProbity (<http://molprobity.biochem.duke.edu/>).



**Table S3.** Summary of the type I  $\beta$ -turn sequences and dihedral angles of the WT Fc (PDBID:3AVE, chain B) and FA variant (chain B) structures.

| Fc variant | PDB/chain | Turn Sequence | Gln/Phe295 |       | Tyr/Ala296 |       | Asn297 |       | Ser298 |      | Thr299 |       |
|------------|-----------|---------------|------------|-------|------------|-------|--------|-------|--------|------|--------|-------|
|            |           |               | phi        | psi   | phi        | psi   | phi    | psi   | phi    | psi  | phi    | psi   |
| WT         | 3AVE/B    | Gln295-Ser298 | -112.9     | 164.3 | -63.1      | -36.5 | -84.6  | 23.1  | 73.8   | 23.6 | -126.5 | 169.3 |
| FA         | 4QGT/B    | Phe295-Ser298 | -99.6      | 173.7 | -62.5      | -32.8 | -60.1  | -37.8 | 84.9   | 4.4  | -88.6  | 117.9 |
